# Supplementary material for: Effect of Phosphorus Application on Subcellular Distribution and Chemical Morphology of Cadmium in Eggplant Seedlings under Cadmium Stress
Source: MDPI journal article supplement (doi:10.3390/agronomy14050932), 2024-04-29
Supplement: s1 [file s1]

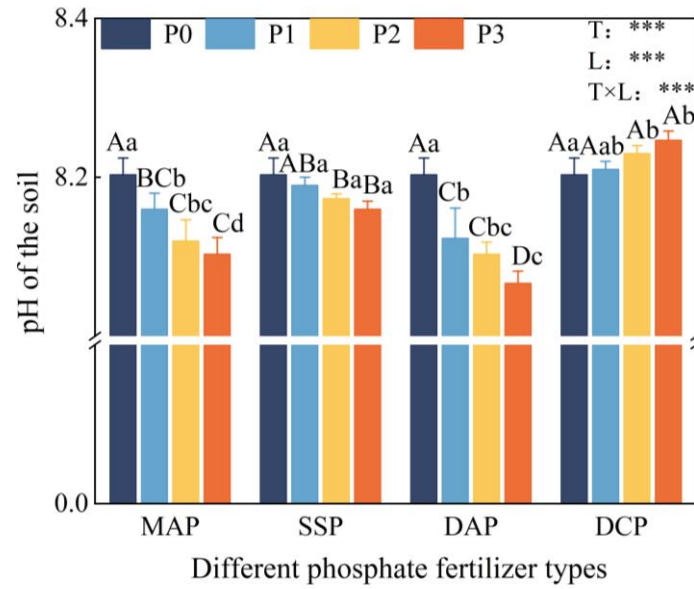

**Figure S1. Soil pH of different P fertilizers applied.** Upper case letters (A, B, C, D) denote significant differences between different P fertilizer types with the same P fertilizer level, and lower case letters (a, b, c, d) denote significant differences between different P fertilizer levels with the same P fertilizer type. The T and L in each column indicate two-way ANOVA significance levels for P fertilizer type and level.

\*\*\*,  $P < 0.05$
